# Supplementary material for: The pathophysiology of traumatic brain injury at a glance
Source: PubMed Central journal article supplement (PMC3820255; doi:10.1242/dmm.011585), 2013-09-12
Supplement: supp_011585_DMM011585.pdf [file supp_011585_DMM011585.pdf]

# The pathophysiology of traumatic brain injury at a glance

Mayumi Prins, Tiffany Greco, Daya Alexander and Christopher C. Giza

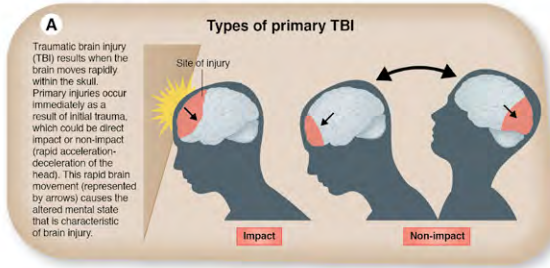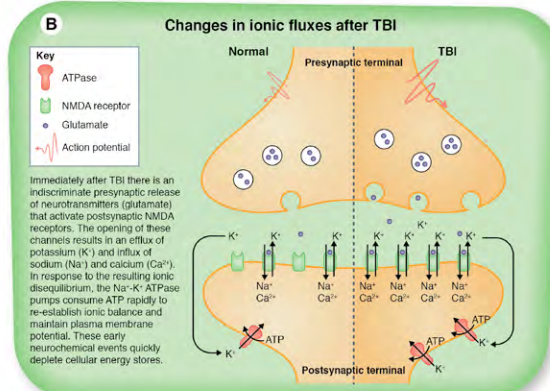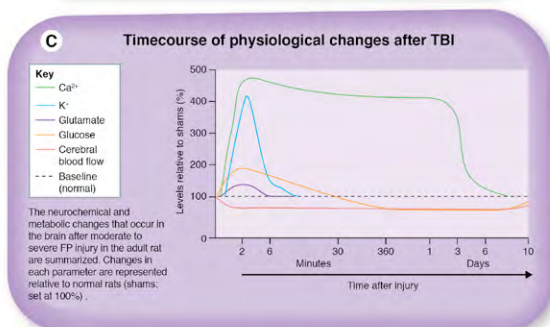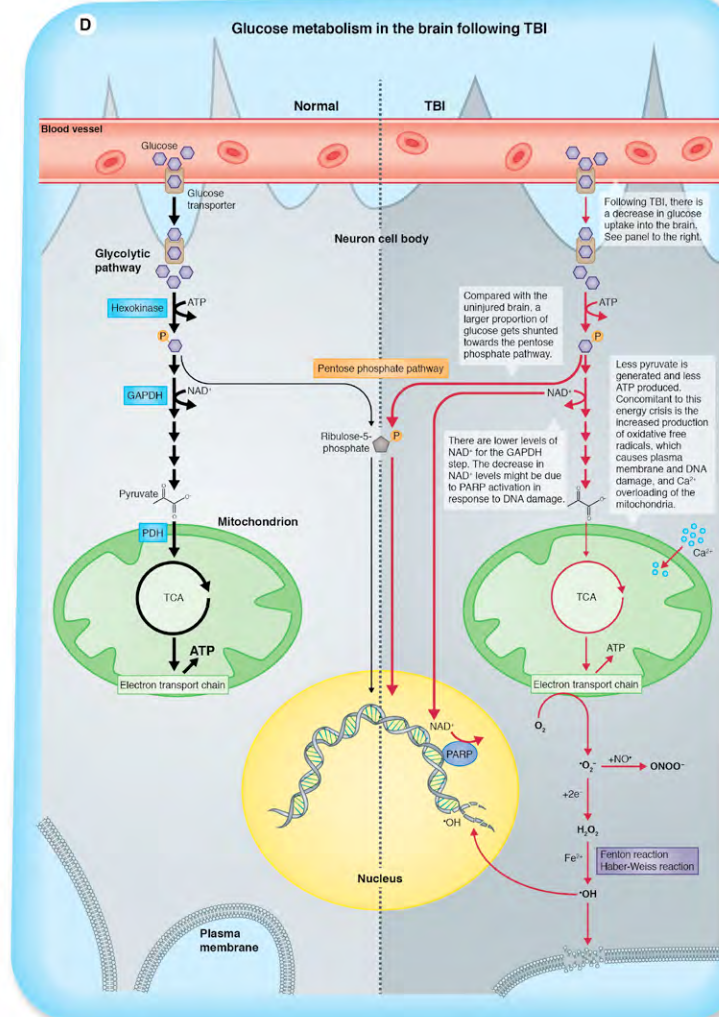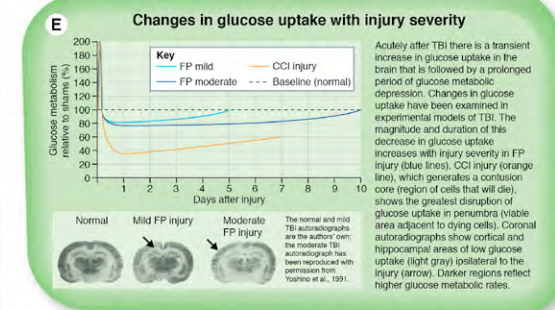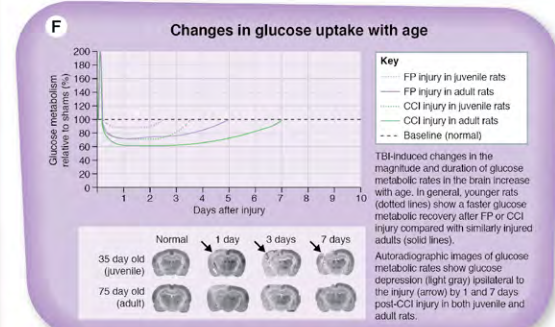

**G** **Potential metabolic therapies to treat TBI**

| Metabolic therapy  | Age of rat model     | Injury model | Outcome                                                                       | References                                                                       |
|--------------------|----------------------|--------------|-------------------------------------------------------------------------------|----------------------------------------------------------------------------------|
| Lactate            | Adult                | FP           | Increased brain lactate uptake and improved cognitive performance             | Chen et al., 2000; Rice et al., 2002; Holbaway et al., 2007                      |
| Sodium pyruvate    | Adult                | CCI          | Decreased cell loss, and neurobehavioral recovery                             | Fukushima et al., 2009; Moro and Sutton, 2010; Moro et al., 2011                 |
| Ketogenic diet     | Adolescent and adult | CCI          | Decreased cell loss, and improved motor and cognitive deficits and ATP levels | Prins et al., 2006; Prins, 2008; Appelberg et al., 2009; Ding-Bjant et al., 2011 |
| Ketogenic diet     | Adolescent           | CCI          | Decreased cytochrome c release and cell death                                 | Hu et al., 2009a, 2009b                                                          |
| Fasting ketosis    | Adult                | CCI          | Decreased oxidative stress and improved mitochondrial function                | Davis et al., 2008                                                               |
| Acetyl-L-carnitine | Immature             | CCI          | Decreased cell loss and improved behavioral outcome                           | Scalfi et al., 2010                                                              |

**Abbreviations:** CCI, controlled cortical impact; FP, fluid percussion; GAPDH, glyceraldehyde 3-phosphate dehydrogenase; NAD, nicotinamide adenine dinucleotide; NMDA, N-methyl-D-aspartate; PARP, poly-ADP ribose polymerase; PDH, pyruvate dehydrogenase; TBI, traumatic brain injury; TCA (cycle), tricarboxylic acid cycle.

See accompanying text for references.
